# Supplementary material for: Ammonia (NH 3 ) in the UTLS: GLORIA airborne measurements for CAMS model evaluation in the Asian Monsoon and in biomass burning plumes above the South Atlantic
Source: Copernicus journal article supplement (doi:10.5194/egusphere-2024-77), 2024-01-29
Supplement: Supplementary file 1 [file egusphere-2024-77-supplement.pdf]

# Introduction

In this document, supplementary information is shown: Comparisons of PAN between GLORIA, CAMS reanalysis, and CAMS forecast (Figs. S1-S5), and comparisons of IASI total columns and CAMS forecast surface VMRs.

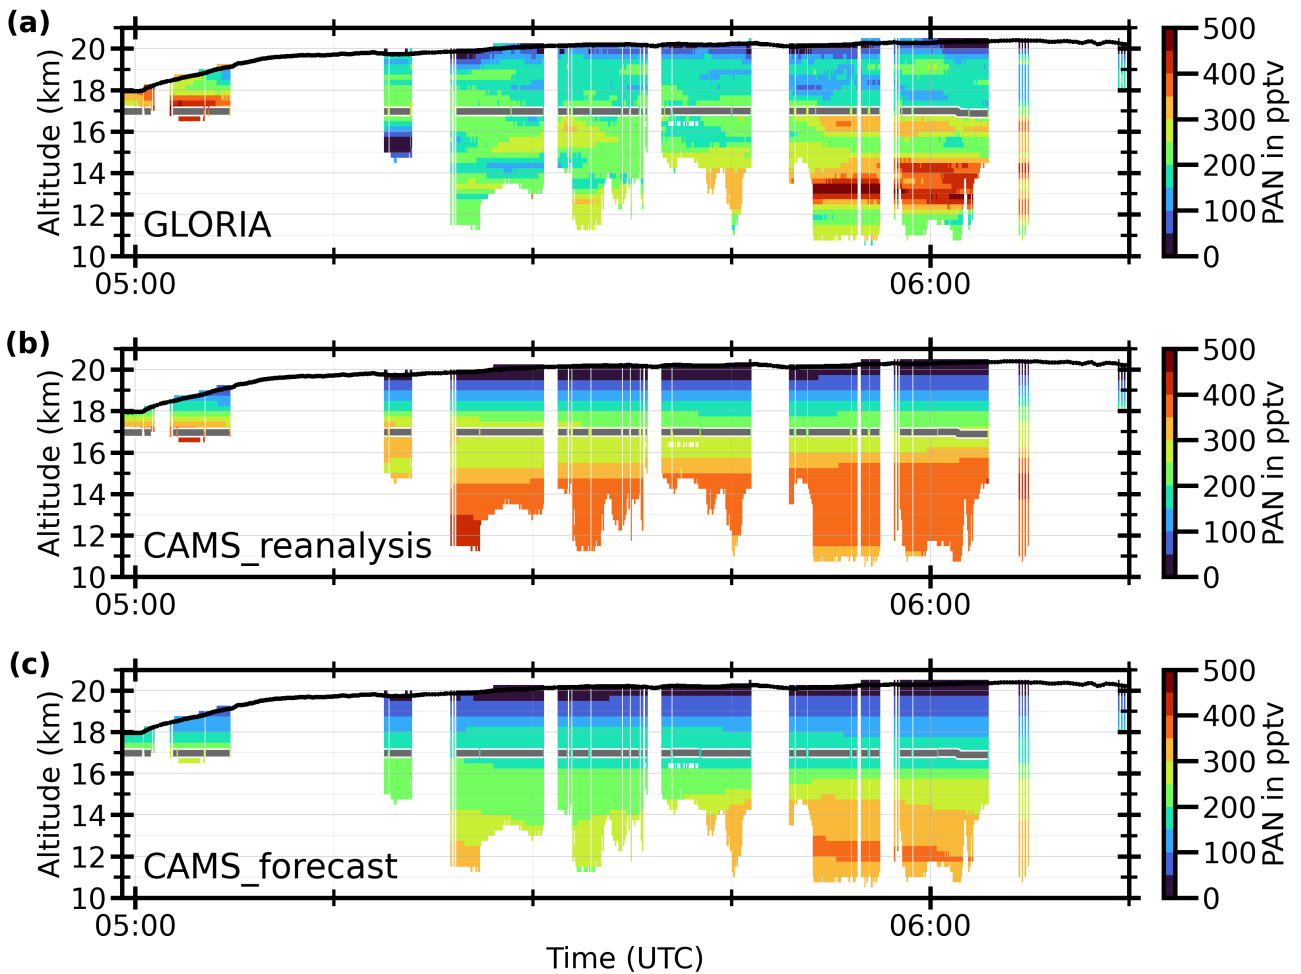

Figure S1: StratoClim flight on 29 July 2017: GLORIA time/altitude cross sections of (a) PAN together with (b) CAMS reanalysis and (c) CAMS forecast simulation results, interpolated onto GLORIA geolocations. GLORIA data is horizontally averaged to match lower horizontal resolutions of CAMS forecast of  $\approx 44$  km. The black line indicates flight altitudes, the gray line shows the ECMWF analysis 380 K potential temperature as indication of the tropopause location in the Asian Monsoon. Blank spaces indicate regions of high cloud tops, calibration measurements, or aircraft movements.

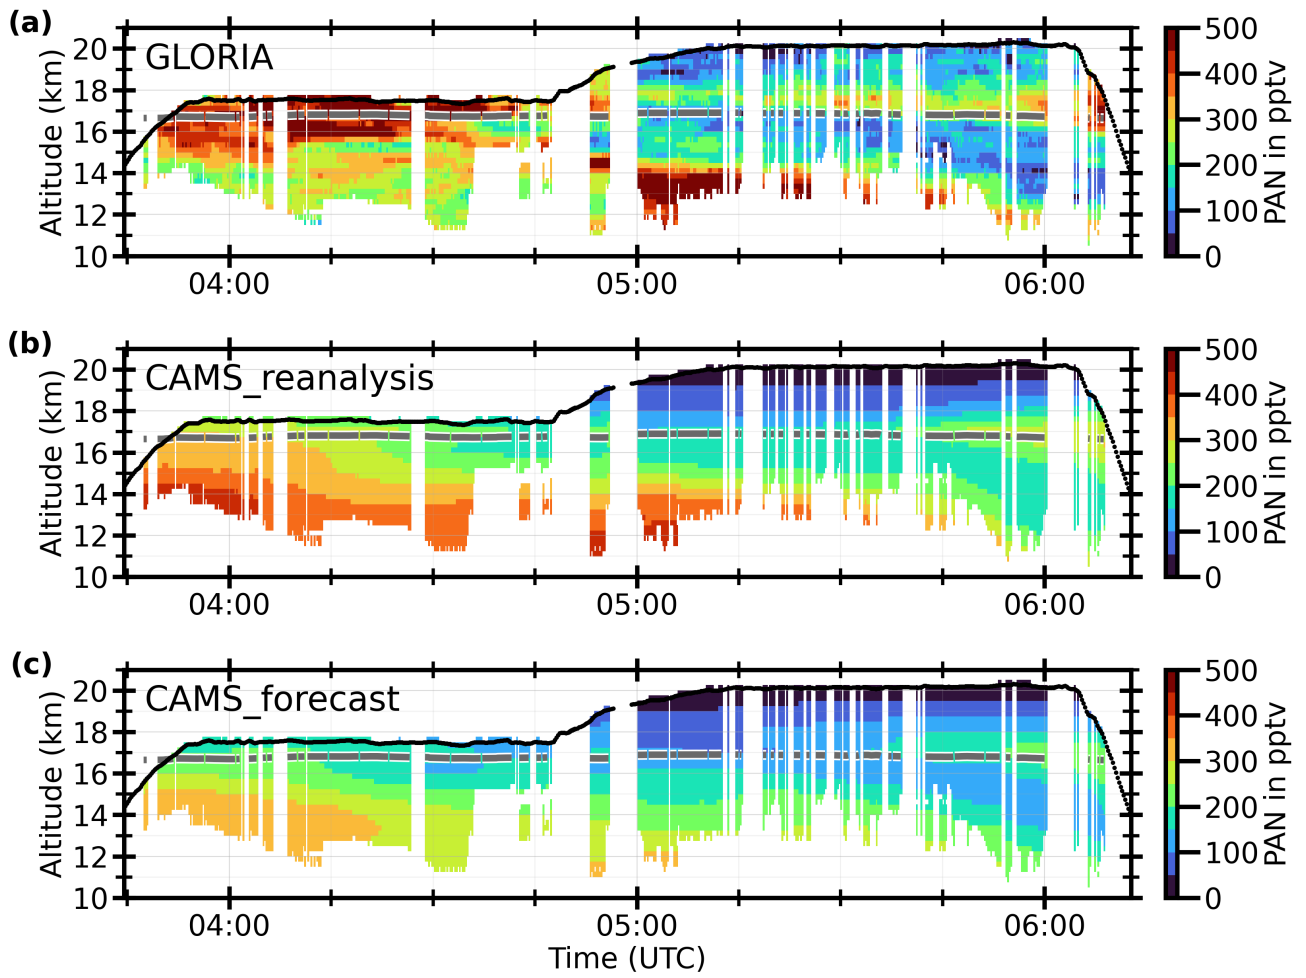

Figure S2: Same as Fig. S1, but for StratoClim flight on 31 July 2017.

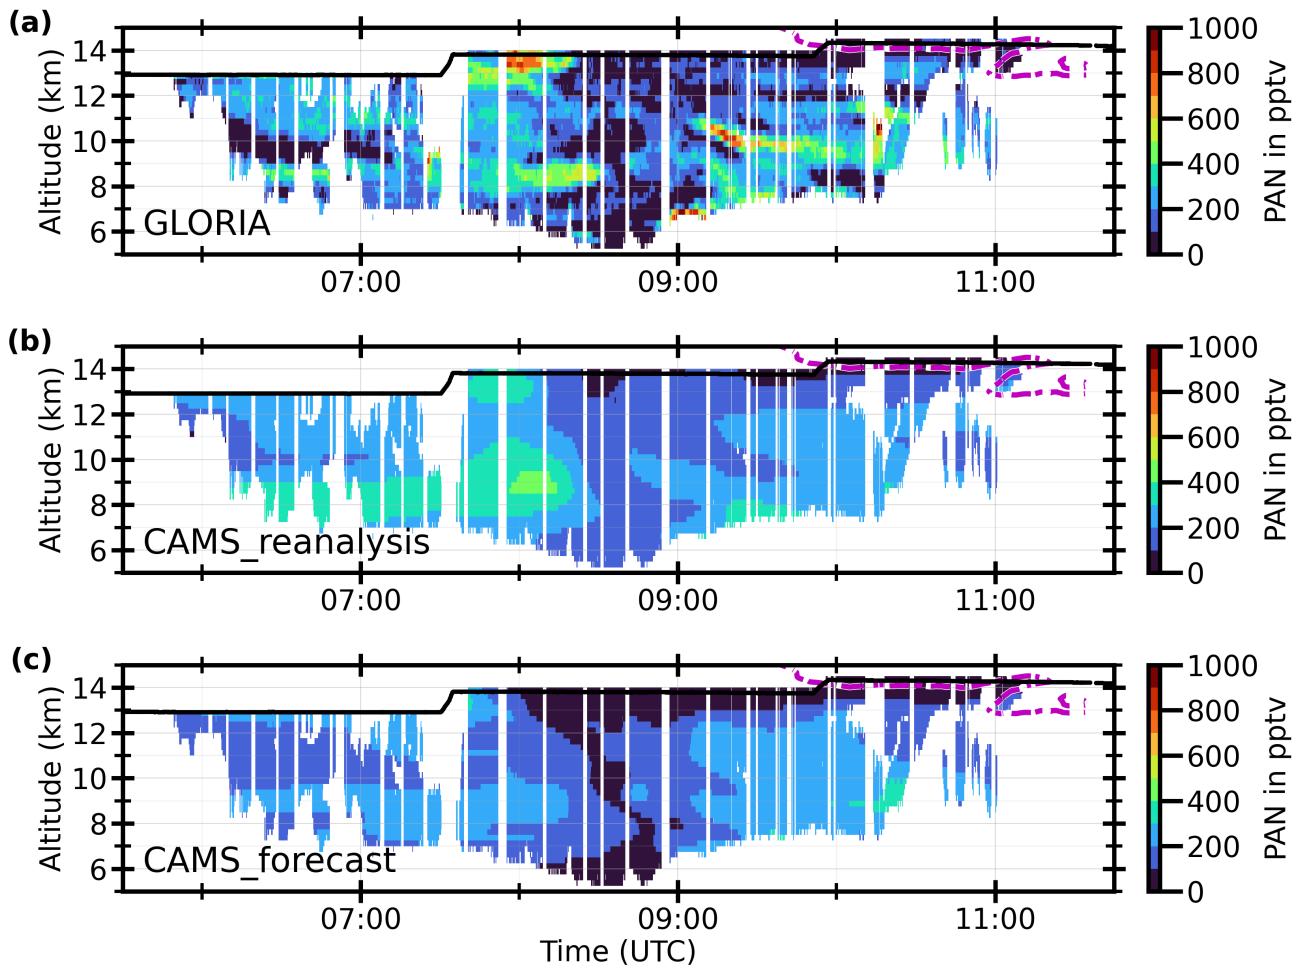

Figure S3: Same as Fig. S1, but for SouthTRAC flight on 8 September 2019. Note that color bars have changed compared to previous plots.

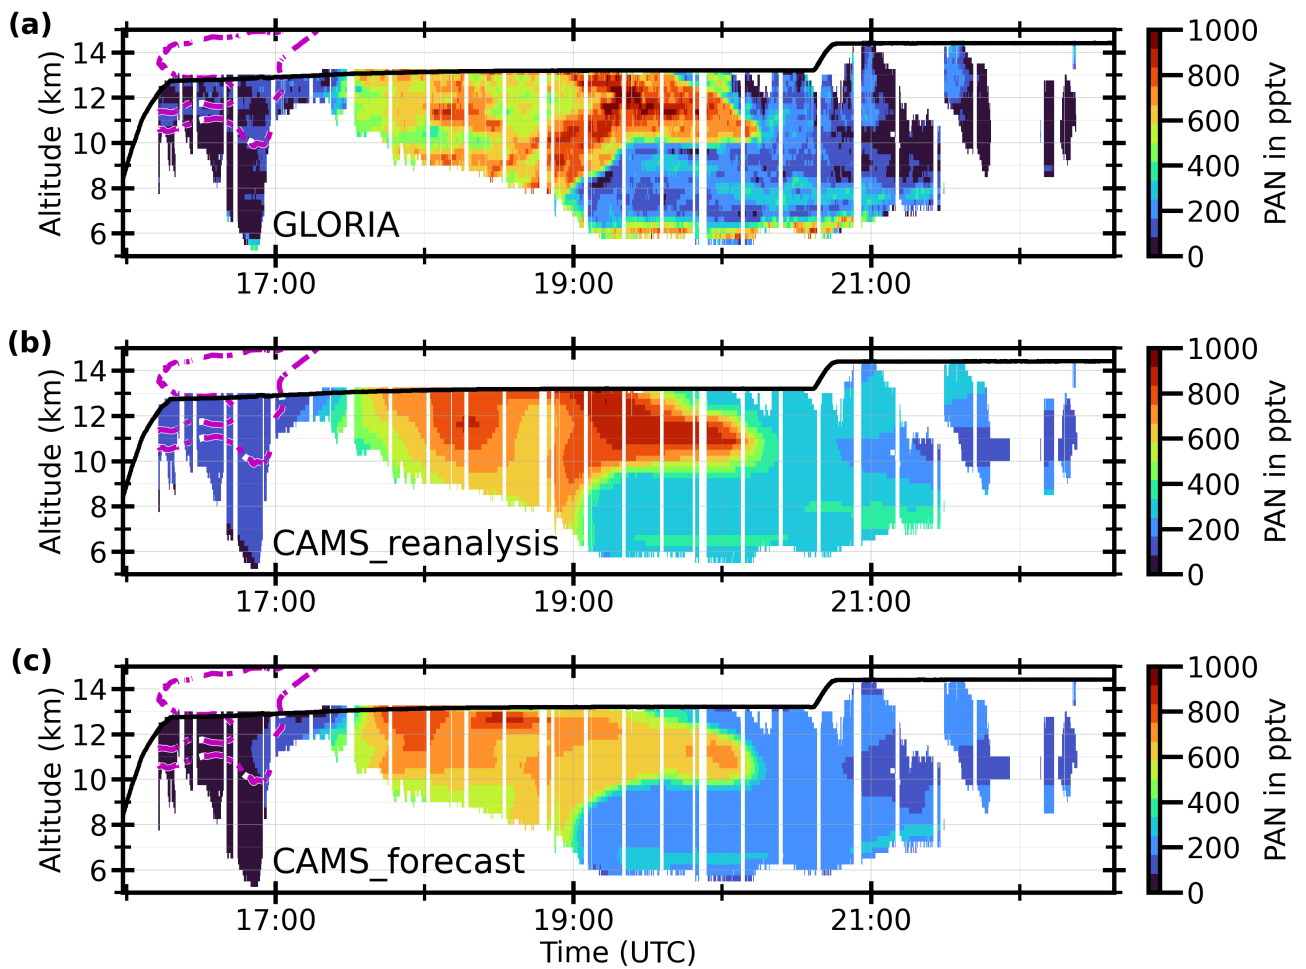

Figure S4: Same as Fig. S1, but for SouthTRAC flight on 7 October 2019.

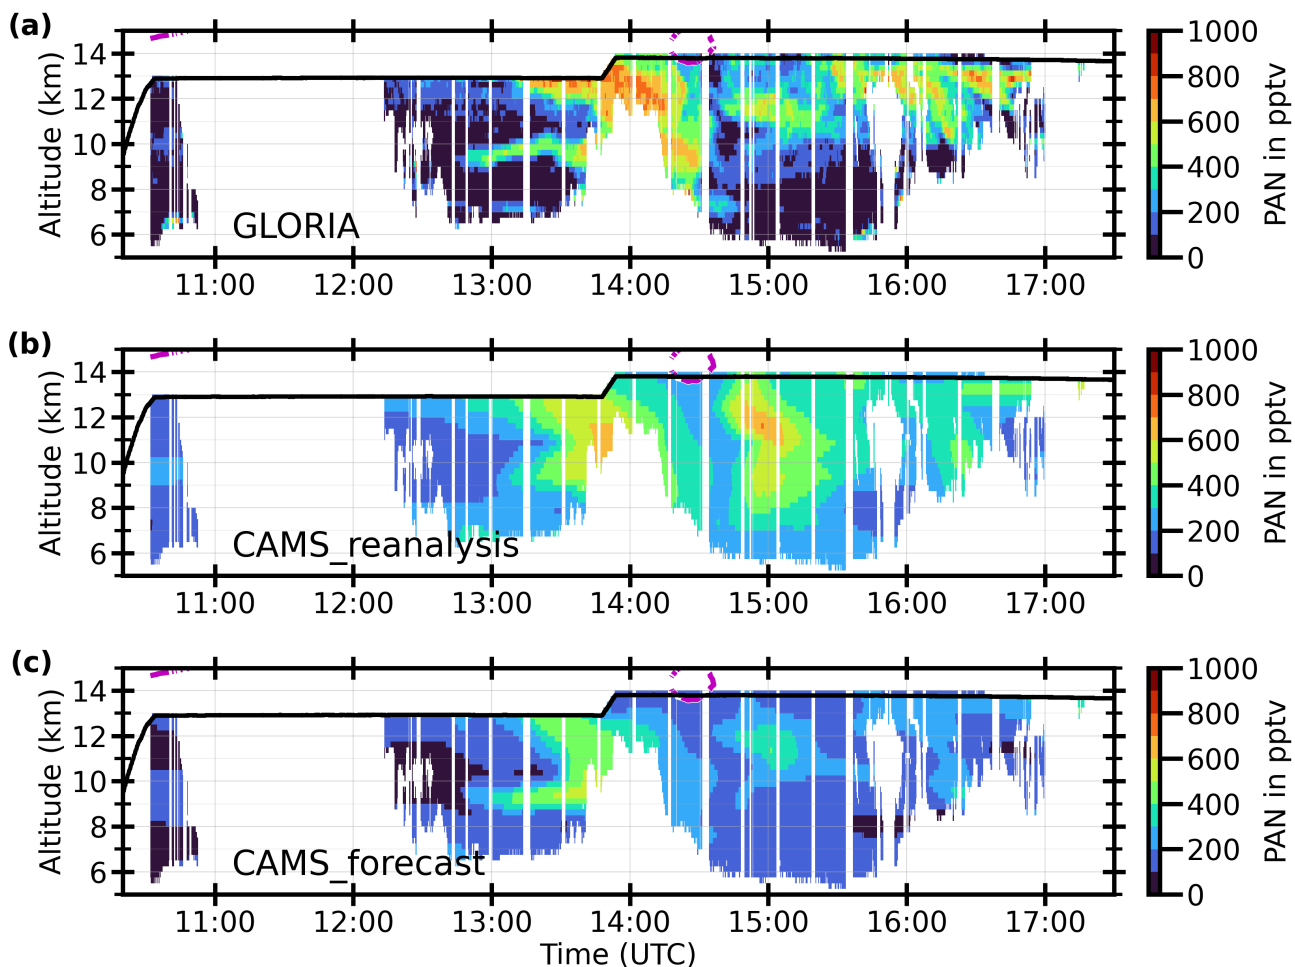

Figure S5: Same as Fig. S1, but for SouthTRAC flight on 4 November 2019.

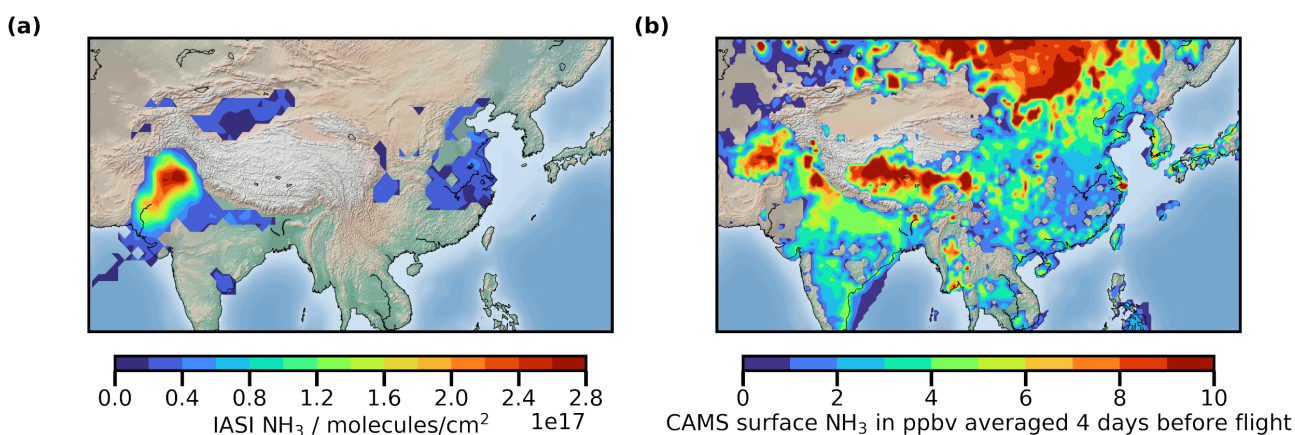

Figure S6: (a) IASI (METOP-A+B) total column  $\text{NH}_3$ , averaged for days (26-30 July 2017) before the StratoClim flights. Averaged columns smaller than  $1.4 \times 10^{16}$  molecules/ $\text{cm}^{-2}$  (5% of the maximum of the color bar) are filtered out to focus on maximum columns. (b) CAMS forecast surface VMR, averaged for days as in (a) before the StratoClim flights. Surface VMRs smaller than 0.05 ppbv (5% of the maximum of the color bar) are filtered out to focus on maximum VMRs.

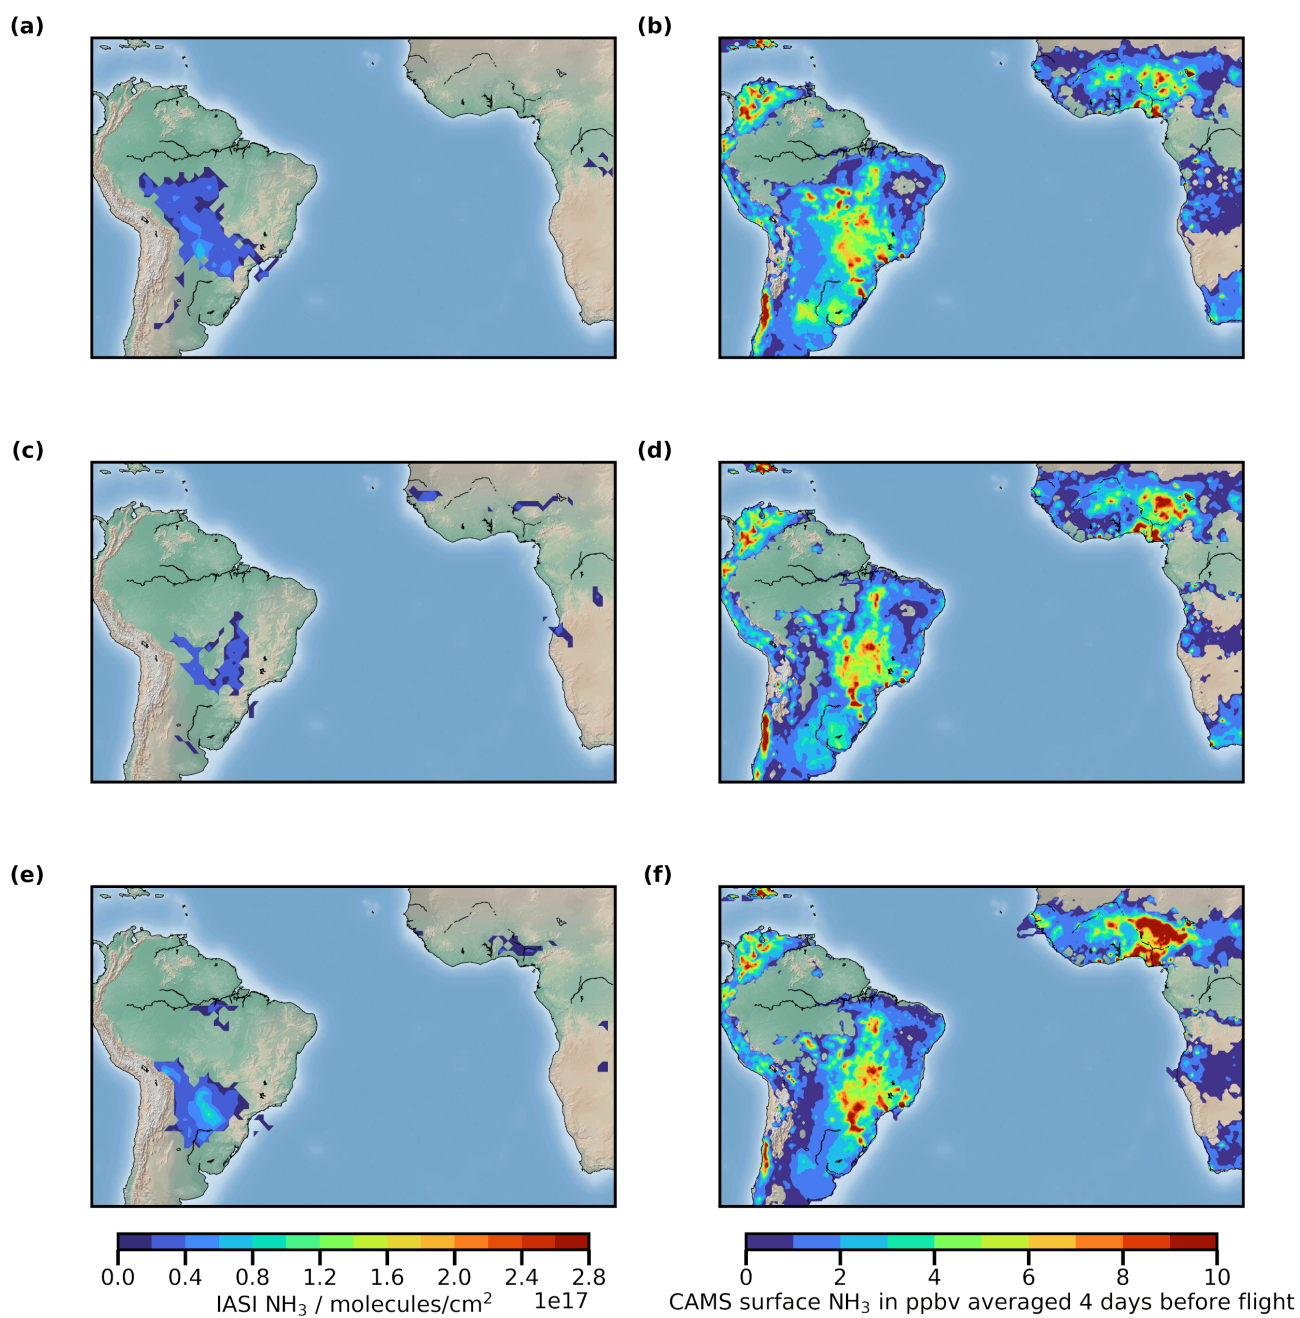

Figure S7: Same as Fig. S6, but for SouthTRAC flights on (a-b) 8 September 2019, (c-d) 7 October 2019, (e-f) 4 November 2019.
